# Supplementary material
Source: PubMed Central journal article supplement (PMC4187670)
Supplement: JB.01832-14_zjb999093276so1.pdf [file JB.01832-14_zjb999093276so1.pdf]

**Table S1: Strains used in this study**

**Table S2: Plasmids used in this study**

**Table S3: Oligonucleotides used in this study**

**Fig S1.** Complementation constructs for *ligC1* and *ligC2* and *ligCTB*. LigC1 and LigC2 are divergently transcribed in the *M. smegmatis* genome. The active site lysine for LigC1 (K32) and LigC2 (K29) are indicated. The complementation constructs for LigC1, LigC1-HA, LigC2, LigC2 HA, MOP-LigC2-HA are indicated as horizontal lines.

**Fig S2.** Amplification products from white colonies of *ligD*-(K484A) and *ligD*-(D136A-D138A) strains in the I-SceI chromosomal assay. Representative gels showing the PCR-amplification products of the white colonies from *ligD*-(K484A) (A) and *ligD*-(D136A-D138A) (B) strains, obtained using primers that anneal 836 bp upstream and 511 bp downstream from the first I-SceI site on the chromosome. The PCR product arising from amplification of an intact chromosomal I-SceI site is indicated by the 1350 bp band (denoted by an arrow next to the gel) and is marked as “I” above the lane. NHEJ events with a deletion are marked as “D” above the lane.

**Fig S3.** Blunt-end junction sequences of non-faithful repair events in the strains *ligD*-(K484A) and *ligD*-(K484A) $\Delta$ *ligC1/C2/B* complemented with *ligC1*. The two halves of the EcoRV recognition site are colored blue and red. Non-templated nucleotide additions are shown in green. The length of the deletion is indicated by a number next to the junction.

**Fig S4.** Junction sequences of non-faithful repair events at the 5' end in the strains *ligD*-(K484A) and *ligD*-(K484A) $\Delta$ *ligC1/C2/B* complemented with *ligC1*. The two halves of the Asp718I recognition site are shown in blue and red. Templated and non-templated nucleotide additions are shown in green. The length of the deletion is indicated by a number next to the junction.

**Fig S5.** Amino acid sequence alignment of LigC1, LigCTB and LigC2. Clustal W2 was used to align amino acid sequences of LigC1, LigC2 and LigCTB. Amino acid sequence identity is marked by an asterisk (\*), a match of the functional group by a colon (:), and a match of the charge of the R group by a full stop (.).

**Fig S6.** Relative mRNA expression level of *ligC1* (A), *ligC2* (B) and *ligCTB* (C) in complementation strains. The level of *ligC1*, *ligC2* and *ligCTB* mRNA expressed from *ligC1*,

*MOP* and *ligC2* promoters was measured using RT-PCR in strains complemented with *ligC1*, *ligC2* and *ligCTB*.

**Fig S7. Ku is upregulated in nonreplicating *M. smegmatis*.** RT-qPCR quantitation of *ku* (A), *ligD* (B), *ligC1* (C) and *ligC2* (D) in log and stationary phases. Relative mRNA levels are given in relation to the mRNA for *sigA*. E)  $\beta$ -galactosidase activity measured using the fluorescent  $\beta$ -galactosidase substrate C2FDG and reported as relative fluorescent units (RFU) at different cell densities. Grey bars are the control strain containing a promoterless *lacZ*. Significant differences ( $p < 0.05$ ) in mRNA expression or promoter activity are marked with an asterisk (\*).

**Table S1**

| <b>Strain</b> | <b>Genotype</b>                                    | <b>Reference</b> | <b>Description</b>                                      |
|---------------|----------------------------------------------------|------------------|---------------------------------------------------------|
| Wild-type     | <i>M. smegmatis</i> MC <sup>2</sup> 155            |                  |                                                         |
| MGM 139       | $\Delta ligC1-C2$                                  | (1)              |                                                         |
| MGM 140       | $\Delta ligD$                                      | (1)              |                                                         |
| MGM 154       | $\Delta ku$                                        | (1)              |                                                         |
| MGM 801       | <i>ligD</i> -(D136A-D138A)                         | (2)              | inactivated polymerase                                  |
| MGM 802       | <i>ligD</i> -( $\Delta$ POL)                       | (2)              | POL domain deletion                                     |
| MGM 803       | <i>ligD</i> -(K484A)                               | (3)              | inactivated ligase                                      |
| MGM 805       | <i>ligD</i> -( $\Delta$ LIG)                       | (2)              | LIG domain deletion                                     |
| MGM 806       | <i>ligD</i> -(E310A)                               | (2)              | no phosphomonoesterase activity                         |
| MGM 807       | <i>ligD</i> -(H336A)                               | (2)              | no phosphomonoesterase and phosphodiesterase activities |
| MGM 808       | $\Delta ligB/\Delta ligC/\Delta ligD$              | (2)              | Lacking all ATP dependent DNA ligases                   |
| MGM 810       | <i>ligD</i> -(K484A) $\Delta ligC1-C2/\Delta ligB$ | (2)              |                                                         |
| MGM 812       | <i>ligD</i> -(POL only)                            | This work        |                                                         |
| MGM 832h      | MGM 810::pDB60                                     | This work        | <i>ligD</i> -(K484A) $\Delta ligC1-C2/B$ + vector       |
| MGM 833h      | MGM 810::pHB3                                      | This work        | <i>ligD</i> -(K484A) $\Delta ligC1-C2/B$ +LigB          |
| MGM 834h      | wild-type::pDB60                                   | This work        | WT + vector                                             |
| MGM 835h      | MGM 803::pDB60                                     | This work        | <i>ligD</i> -(K484A)+vector                             |
| MGM 839h      | MGM 810::pHB1                                      | This work        | <i>ligD</i> -(K484A) $\Delta ligC1-C2/B$ +LigC1         |
| MGM 840h      | MGM 810::pHB2                                      | This work        | <i>ligD</i> -(K484A) $\Delta ligC1-C2/B$ +LigC2         |
| MGM 843       | $\Delta polD1$                                     | (4)              |                                                         |
| MGM 844h      | $\Delta polD1$ in MGM 803                          | This work        |                                                         |
| MGM 846       | <i>ligD</i> -(D136A-D138A) $\Delta polD1-D2$       | (4)              |                                                         |
| MGM 854h      | MGM 801::pDB60                                     | This work        | LigD-POL dead +vector                                   |
| MGM 856h      | MGM 154::pDB60                                     | This work        | $\Delta ku$ + vector                                    |
| MGM 858h      | MGM 140::pDB60                                     | This work        | $\Delta ligD$ + vector                                  |

|          |                             |           |                                                         |
|----------|-----------------------------|-----------|---------------------------------------------------------|
| MGM 859h | MGM 808::pDB60              | This work | $\Delta ligB/\Delta ligC/\Delta ligD$ + vector          |
| MGM 860h | MGM 808::pHB1               | This work | $\Delta ligB/\Delta ligC/\Delta ligD$ +LigC1            |
| MGM 861h | MGM 808::pHB2               | This work | $\Delta ligB/\Delta ligC/\Delta ligD$ +LigC2            |
| MGM 863h | MGM 810::pHB6               | This work | $ligD-(K484A)\Delta ligC1-C2/\Delta ligB$ +LigC2-HA     |
| MGM 864h | MGM 810::pHB7               | This work | $ligD-(K484A)\Delta ligC1-C2/\Delta ligB$ +MOP-LigC2-HA |
| MGM 865h | MGM 810::pHB5               | This work | $ligD-(K484A)\Delta ligC1-C2/\Delta ligB$ +LigC1-HA     |
| MGM 866h | MGM 810::pHB8               | This work | $ligD-(K484A)\Delta ligC1-C2/\Delta ligB$ +LigCTB       |
| MGM 867h | wild-type::pJEM 13          | This work | promoterless <i>lacZ</i>                                |
| MGM 164h | wild-type::pMSG335          | This work | <i>lacZ</i> under native <i>ku</i> promoter             |
| Mgm1602  | $mc^2155 attB$ ::pRGM10     | (5)       |                                                         |
| Mgm1605  | Mgm140 <i>attB</i> ::pRGM10 | (5)       |                                                         |
| Mgm1642  | Mgm801 <i>attB</i> ::pRGM10 | This work |                                                         |
| Mgm1644  | Mgm802 <i>attB</i> ::pRGM10 | This work |                                                         |
| Mgm1638  | Mgm803 <i>attB</i> ::pRGM10 | This work |                                                         |
| Mgm1646  | Mgm805 <i>attB</i> ::pRGM10 | This work |                                                         |

1. **Gong C, Bongiorno P, Martins A, Stephanou NC, Zhu H, Shuman S, Glickman MS.** 2005. Mechanism of nonhomologous end-joining in mycobacteria: a low-fidelity repair system driven by Ku, ligase D and ligase C. *Nat Struct Mol Biol* **12**:304–312.
2. **Aniukwu J, Glickman MS, Shuman S.** 2008. The pathways and outcomes of mycobacterial NHEJ depend on the structure of the broken DNA ends. *Genes Dev* **22**:512–527.
3. **Akey D, Martins A, Aniukwu J, Glickman MS, Shuman S, Berger JM.** 2006. Crystal structure and nonhomologous end-joining function of the ligase component of Mycobacterium DNA ligase D. *J Biol Chem* **281**:13412–13423.
4. **Zhu H, Bhattarai H, Yan HG, Shuman S, Glickman MS.** 2012. Characterization of Mycobacterium smegmatis PolD2 and PolD1 as RNA/DNA polymerases homologous to the POL domain of bacterial DNA ligase D. *Biochemistry* **51**:10147–10158.
5. **Gupta R, Barkan D, Redelman-Sidi G, Shuman S, Glickman MS.** 2011. Mycobacteria exploit three genetically distinct DNA double-strand break repair pathways. *Mol Microbiol* **79**:316–330.

**Table S2**

| Plasmid name | Relevant feature                                         | Source     |
|--------------|----------------------------------------------------------|------------|
| pHB1         | pDB60 <i>nat_ligC1</i>                                   | This study |
| pHB2         | pDB60 <i>nat_ligC2</i>                                   | This study |
| pHB3         | pDB60 <i>nat_ligB</i>                                    | This study |
| pHB4         | pDB60MOP_ <i>ligC2</i>                                   | This study |
| pHB5         | pDB60 <i>nat_ligC1HA</i>                                 | This study |
| pHB6         | pDB60 <i>nat_ligC2HA</i>                                 | This study |
| pHB7         | pDB60 MOP_ <i>ligC2HA</i>                                | This study |
| pHB8         | pDB60 <i>ligC1p_ligCTBHA</i>                             | This study |
| pJEM13       | lacZ translational fusion vector                         | (1)        |
| pMSG335      | Translational fusion of Ku (AA1-4) to B galactosidase    | This study |
| pDB60        | <i>attB</i> site and L1 transposon                       | (2)        |
| pRGM10       | I-SceI recombination substrate to assay NHEJ, SSA and HR | (3)        |

1. **Timm J, Lim EM, Gicquel B.** 1994. Escherichia coli-mycobacteria shuttle vectors for operon and gene fusions to lacZ: the pJEM series. *J. Bacteriol.* **176**:6749–53.
2. **Barkan D, Liu Z, Sacchetti JC, Glickman MS.** 2009. Mycolic acid cyclopropanation is essential for viability, drug resistance, and cell wall integrity of Mycobacterium tuberculosis. *Chem. Biol.* **16**:499–509.
3. **Gupta R, Barkan D, Redelman-Sidi G, Shuman S, Glickman MS.** 2011. Mycobacteria exploit three genetically distinct DNA double-strand break repair pathways. *Mol Microbiol* **79**:316–330.

| <b>Table S3</b>         |                                                          |                             |
|-------------------------|----------------------------------------------------------|-----------------------------|
| <b>oligonucleotides</b> | <b>sequence (5' to 3')</b>                               | <b>note</b>                 |
| ligC1_3'                | GGATCTGGTTCACGGACTTC                                     |                             |
| ligC5'                  | CGCACTGGCCATCACTGTTC                                     |                             |
| ligC3'                  | ACTGCGGTTCGGCTAAACCC                                     |                             |
| ligC2_5'                | GCCTTGGCAAGCATCGGTTC                                     |                             |
| HA tag to LigC2         | CCGATATCTTAAGCGTAGTCTGGGACGTCGTATGGGTAAACCCGGCAGATGTCAC  |                             |
| HA into LigC1           | CCTCTAGATTAAGCGTAGTCTGGGACGTCGTATGGGTACTGTTCTCCAGCACGTCG |                             |
| LigB_pro_for            | ATCAGTCGCGCTCGTAGAAC                                     |                             |
| LigB_pro_rev            | CTGGCACTACGTCACCTTCG                                     |                             |
| ligCTBwithC1pF          | GGTAAGAATGGGAAGGATGCAGTTACCCGTC                          |                             |
| ligCTBwithC1pR          | GACGGGTAAGTGCATCCTTCCCATTCTTACC                          |                             |
| ligCTBHAtag             | CCGATATCTTAAGCGTAGTCTGGGACGTCGTATGGGTAGCGTAGGCCCGGCAC    |                             |
| HB23                    | TCGAAGAACGCCTCTTCC                                       | <i>ligD</i> qPCR            |
| HB24                    | CCTGACAAGGTGCTCTATCC                                     | <i>ligD</i> qPCR            |
| HB17                    | GCCGGTCAAGGTCTACAG                                       | <i>ku</i> qPCR              |
| HB18                    | GTTGATGTCGCGGTACTCG                                      | <i>ku</i> qPCR              |
| HB9                     | CGAGCAGTTCGGGAAAG                                        | <i>ligC1</i> qPCR           |
| HB10                    | AAGGCGCAGGTGAAG                                          | <i>ligC1</i> qPCR           |
| HB11                    | GTCGCCCATGCTGTC                                          | <i>ligC2</i> qPCR           |
| HB12                    | CGCGGCCACCAATTC                                          | <i>ligC2</i> qPCR           |
| HB21                    | TGGCGATGATGATCTCCC                                       | <i>ligCTB</i> (Rv3731) qPCR |
| HB22                    | TCCGCTCCATCTGCTTTC                                       | <i>ligCTB</i> (Rv3731) qPCR |

|                |                             |                  |
|----------------|-----------------------------|------------------|
| oAF485         | CCAAGCGGGCAGCCAAG           | <i>sigA</i> qPCR |
| oAF486         | GGGCTCAGCCTCGAGATCGTC       | <i>sigA</i> qPCR |
| ku promoter 5' | TCCGCGGCACATAAGTGGCACGTTC   |                  |
| ku promoter 3' | TGGTACCGATGGATCGCATAAGGCCAG |                  |

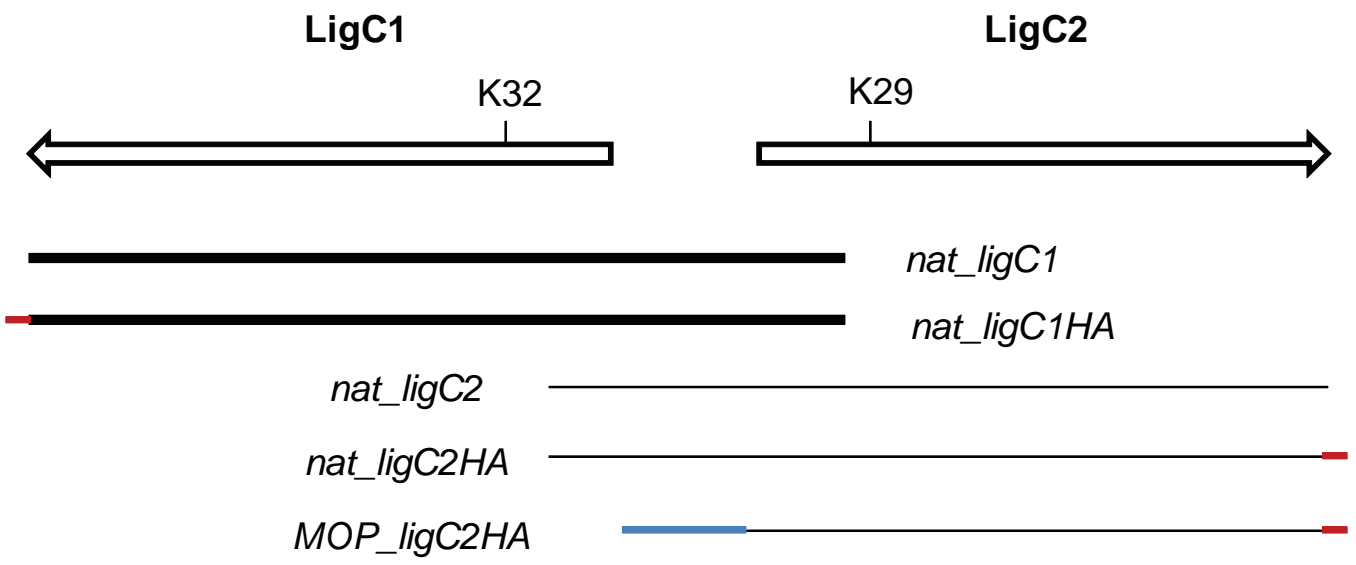

Figure S1



A.

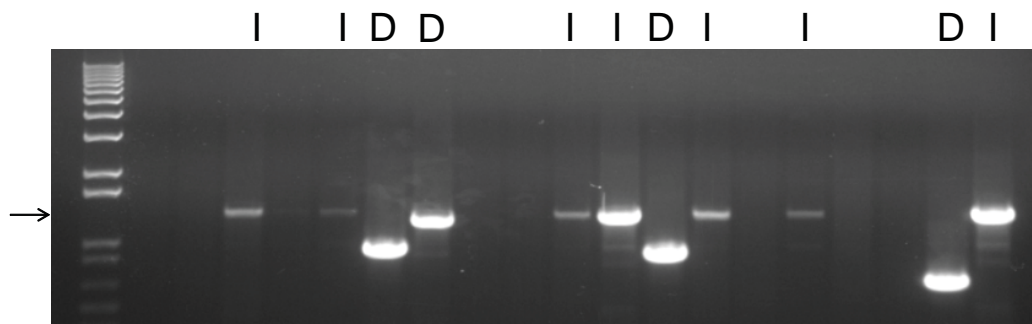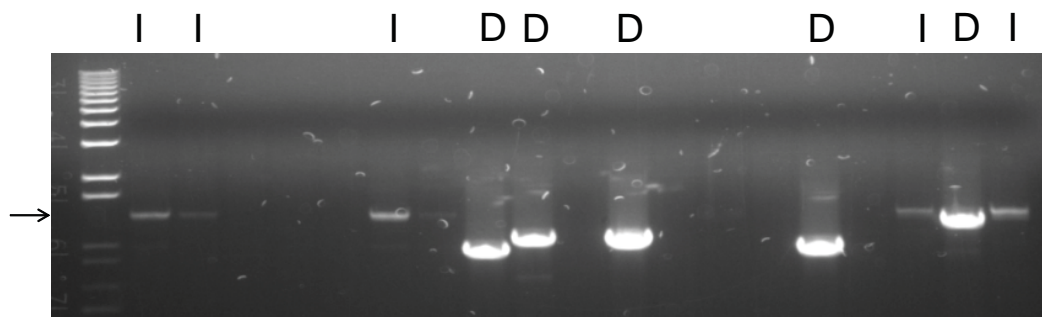

B.

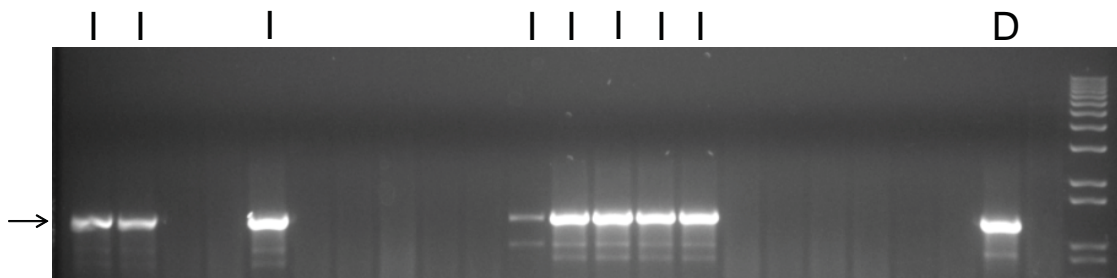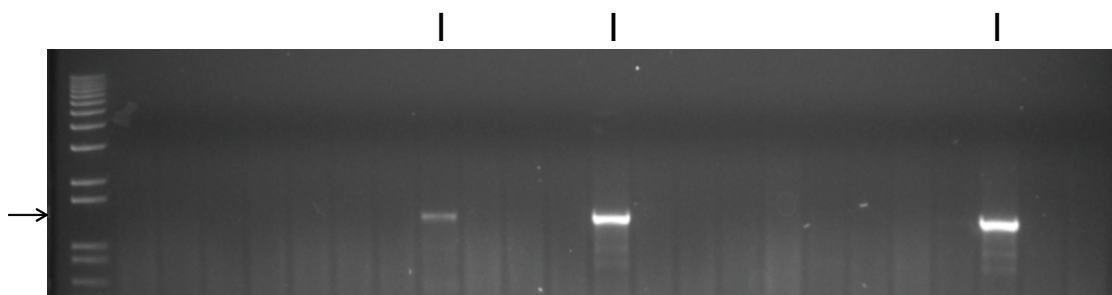

Figure S2

Original

GATGGTGCAGGATATCCTGCTGATGA  
CTACCACGTCCTATAGGACGACTACT

*ligD*-(K484A) $\Delta$ *ligB*/*CattB*:*nat\_ligC1* junctions

TGCACACCGCCGA -169/-170 GCTACCGGCGATG  
ACGTGTGGCGGCT CGATGGCCGCTAC

GATGGTGCAGGATGATCCTGCTGATGA  
CTACCACGTCCTACTAGGACGACTACT

GCAGAAGCCTGCG -140/-129 GGCATGGTGCCAA  
CGTCTTCGGACGC CCGTACCACGGTT

ATCGATGAGCGTG -278/-328 AGTATGAAGGCGG  
TAGCTACTCGCAC TCATACTCCGCC

TGATGGTGCTGCG -556/-37 GCTGTTCGCATTA  
ACTACCACGACGC CGACAAGCGTAAT

TCTATCGTGCGGT -190/-136 TGCCAATGAATCG  
AGATAGCACGCCA ACGGTTACTTAGC

GATGGTGCAGGAT /-455 TGAGAGACGCGC  
CTACCACGTCCTA ACCTCTCTGCGCG

GAAGCAGAAGCCT -143/-208 AGCGCGATCGTAA  
AGATAGCACGCCA TCGCGCTAGCATT

GTCGAAAACCCGA -230/-168 TGGCTACCGGCGA  
CAGCTTTTGGGCT ACCGATGGCCGCT

GATGGTGCAGGATCATCCTGCTGATGA  
CTACCACGTCCTAGTAGGACGACTACT

GATGGTGCAGGAT /-206 GCAGCGCGATCGT  
CTACCACGTCCTA CGTCGCGCTAGCA

GGTCTGCTGCTGC -95/-243 TCGCTGGGGAATG  
AGATAGCACGCCA AGCGACCCCTTAC

*ligD*-(K484A) junctions

GGTCTGCTGCTGC -95/-205 TGCAGCGCGATCG  
CCAGACGACGACG ACGTTCGCGCTAGC

TGATTGAAGCAGA -148/-178 CGATGAGCGAACG  
ACTAACTTCGCTCT GCTACTCGCTTGC

CGCTCACATTTAA -742/-353 CACGGCCACCGAT  
GCGAGTGTA AATT GTGCCGGTGGCTA

GATGGTGCAGGATGATCCTGCTGATGA  
CTACCACGTCCTACTAGGACGACTACT

GATGGTGCAGGAT /-562 AGGGCGGCTTTCGT  
CTACCACGTCCTA TCCCGCCGAAGCA

GATGGTGCAGGATT /-678 TGTATGAACGGTC  
CTACCACGTCCTAA ACATACTTGCCAG

GCAGAAGCCTGCG -140/ ATCCTGCTGATGA  
CGTCTTCGGACGC TAGGACGACTACT

TTTCCGTGACGTC -489/ ATCCTGCTGATGA  
AAAGGCACTGCAG TAGGACGACTACT

GATGGTGCAGGAT /-104 GGATGAAGCCAAT  
CTACCACGTCCTA CCTACTTCGGTTA

Figure S3

Original

GAATCTGCATGGTACCAAGCTTGCTC  
CTTAGACGTACCATGGTTCGAACGAG

*ligD*-(K484A))*ΔligB/CattB:nat\_ligC1* junctions

*ligD*-(K484A) junctions

|                                    |            |                                    |                                      |           |                                    |
|------------------------------------|------------|------------------------------------|--------------------------------------|-----------|------------------------------------|
| CTCAATGCCCCCT<br>GAGTTACGGGGGA     | -84/-80    | CCCCTTTCGCCAG<br>GGGGAAAGCGGT      | CCCCCTAACCCGC<br>GGGGGATTGGGCG       | -77/      | GTACCAAGCTTGCTC<br>CATGGTTCGAACGAG |
| TTCACAAAACGGT<br>AAGTGTTTTGCCA     | -196/      | GTACCAAGCTTGCTC<br>CATGGTTCGAACGAG | TTTTCACAAAACG<br>AAAAGTGTTTTGC       | -198/     | GTACCAAGCTTGCTC<br>CATGGTTCGAACGAG |
| GAATCTGCATGGTAC<br>CTTAGACGTACCATG | /-35       | GGGAAAACCTGG<br>CCCTTTTGGGACC      | TTTTCACAAAACG<br>AAAAGTGTTTTGC       | -198/     | GTACCAAGCTTGCTC<br>CATGGTTCGAACGAG |
| TGATTCGATATTT<br>ACTAAGCTATAAA     | -30/-163   | CGCTTTCCTGGT<br>GCGAAACGGACCA      | GCTAGTACTGGGC<br>CGATCATGACCCG       | -170/-74  | CACATCCCCCTTT<br>GTGTAGGGGGAAA     |
| GTGGCCGCTTGCG<br>CACCGCGAACGC      | -47/266    | ACGGTTACGATGC<br>TGCCAATGCTACG     | GAATCTGCATGGTACA<br>CTTAGACGTACCATGT | /-149     | TGAATGGCGAATG<br>ACTTACCGCTTAC     |
| CTGACCCCGGGGT<br>GACTGGGGCCCCA     | -130/-54   | CCAACTTAATCGC<br>GGTTGAATTAGCG     | GAATCTGCATGGTAC<br>CTTAGACGTACCATG   | /-362     | TCACATTTAATGT<br>AGTGTAATTTACA     |
| TAACTGTAGGCCT<br>ATTGACATCCGGA     | -141/-1216 | GTGGATGAAGCCA<br>CACCTACTTCGGT     | TAAAGCTAGTACT<br>ATTTTCGATCATGA      | -174/-266 | ACGGTTACGATGC<br>TGCCAATGCTACG     |
| AGCGGTTAGCTCC<br>TCGCCAATCGAGG     | -409/-1245 | CATGGTGCCAATG<br>GTACCACGGTTAC     | GAATCTGCATGGTACC<br>CTTAGACGTACCATGG | /-227     | AGGCCGATACTGT<br>TCCGGCTATGACA     |
|                                    |            |                                    | TCTTACTGTCATG<br>AGAATGACAGTAC       | -319/-79  | CCCCTTTTCGCCA<br>GGGGAAAGCGGT      |

Figure S4

```

LigC1      MDLPVQPPIEPMLAKAQVKVPDEAGVWSYEPKWDGFRALVFRDGDVVVLQSRNGKDLGRY 60
LigCTB     MQLPVMPPVSPMLAKSVTAIPDA---SYEPKWDGFRSICFRDGDQVELGSRNERPMTRY 57
LigC2      MDLPVLPVSPMLSKSVNQIPPGM---SYEPKWDGFRSILFRDGAEVELGSRKERPMTRY 57
           *:*** **:.***:*:   :*      *****: :*** :* * **: : : **

LigC1      FPELLDALRDELVEKCVLDGEVVVPRDIAGRVRLDWESLSQRIHPAASRIKMLAEQTPAH 120
LigCTB     FPELVAAIRAELPHRCVIDGEIIIATDHG----LDFEALQQRHPAESRVRMLAD RTPAS 113
LigC2      FPELVAAALTELPDRCVIDGEIVLPADNH----LDFEALQLRLHPAASRVAMLAEQTPAA 113
           *****: *   ** .:***:***:.. *      **:*:* .*:*** **: :***:****

LigC1      FIGFDALALGDRSLLKEPFRVRREALAEAVDNKRWC-----HVTRTSEDPALGTEWLKTF 175
LigCTB     FIAFDLLALGDDDYTGRRPFSERRAALVDAVTGSGADADLSIHVTPATDMATAQRWFSEF 173
LigC2      FIAFDLLALGDDDYTGRRPFSERRALETALADAGP----TFHLTPATTDLPTAQRWFHEF 169
           **.* ** ***** .   .** ** ** *: .      *:* :: * . . .*: *

LigC1      EGAGLDGVIAKRLDGPYLPKGKREMVKVKHHRDADCVAMGYRIHKSG-DGIGSILLGLYRD 234
LigCTB     EGAGLDGVIAKPPHITYQPKRVMFKIKHLRTADCVVAGYRVHKSGSDAIGSLLLGLYQE 233
LigC2      EGAGLDGVIAKPLDLTYQPKRVMFKVKHQRTADCVVAGYRLHKSGADAVGSLLLGLYDD 229
           ***** . . * *.** *.*:** * *****. ***:*** *.:***:*** :

LigC1      DGELQMVGGAASFTAKDRIKLLAELEPLRE-----GDEMREGDPSRWN 277
LigCTB     DGQLASVGVIGAFPMARRLLTELQPLVTSFDDHPWNWAAHVAG--QRTPRKNEFSRWN 291
LigC2      DGSLASVGVIGAFPMATRRALFTELQTLVADFDDHPWNWAAQAAADPELARRYGGGSRWN 289
           **.* ** .:*.   * *.:**:*      * .   ****

LigC1      SAADKRWTPLRPEKVCEVAYDQMEGNSVEGRRFRHAVKFLRWRPDREPSSCTFDQLDTPL 337
LigCTB     VGKDLSFVPLRPERVVEVRYDRMEG-----ARFRHTAQFNRWRPDRDPRSCSYAQLERPL 346
LigC2      AGKDLSFVPLRPERLVEVRYDHMEG-----RRFRHTAQFNRWRPDRDARSCTFAQLDSPP 344
           . *   :.*****: ** **:* **      *****.:* *****:. **:: **:*

LigC1      NYDLYDVLEEQ- 348
LigCTB     TVSLSDIVPGLR 358
LigC2      HSSSVTSCRV-- 354

```

Figure S5

A.

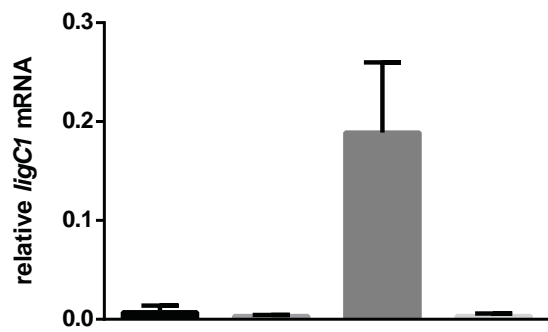

B.

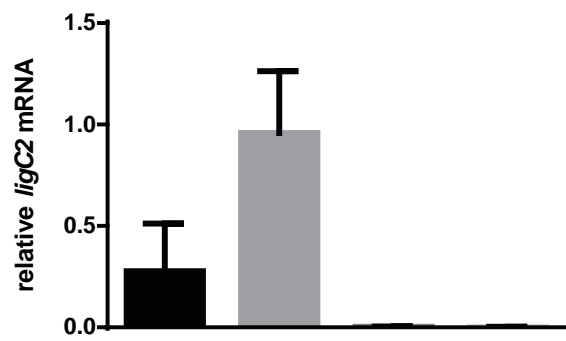

C.

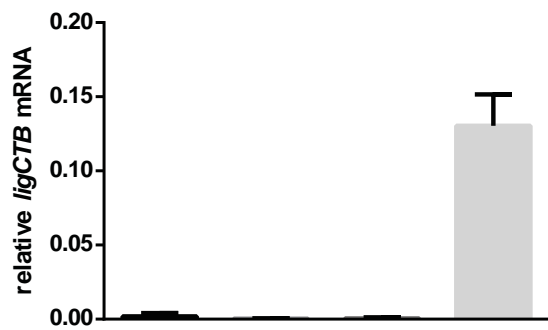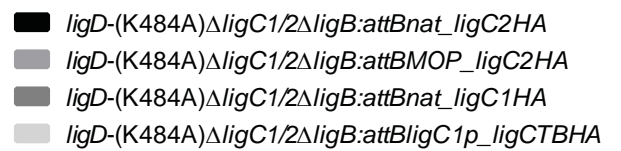

Figure S6

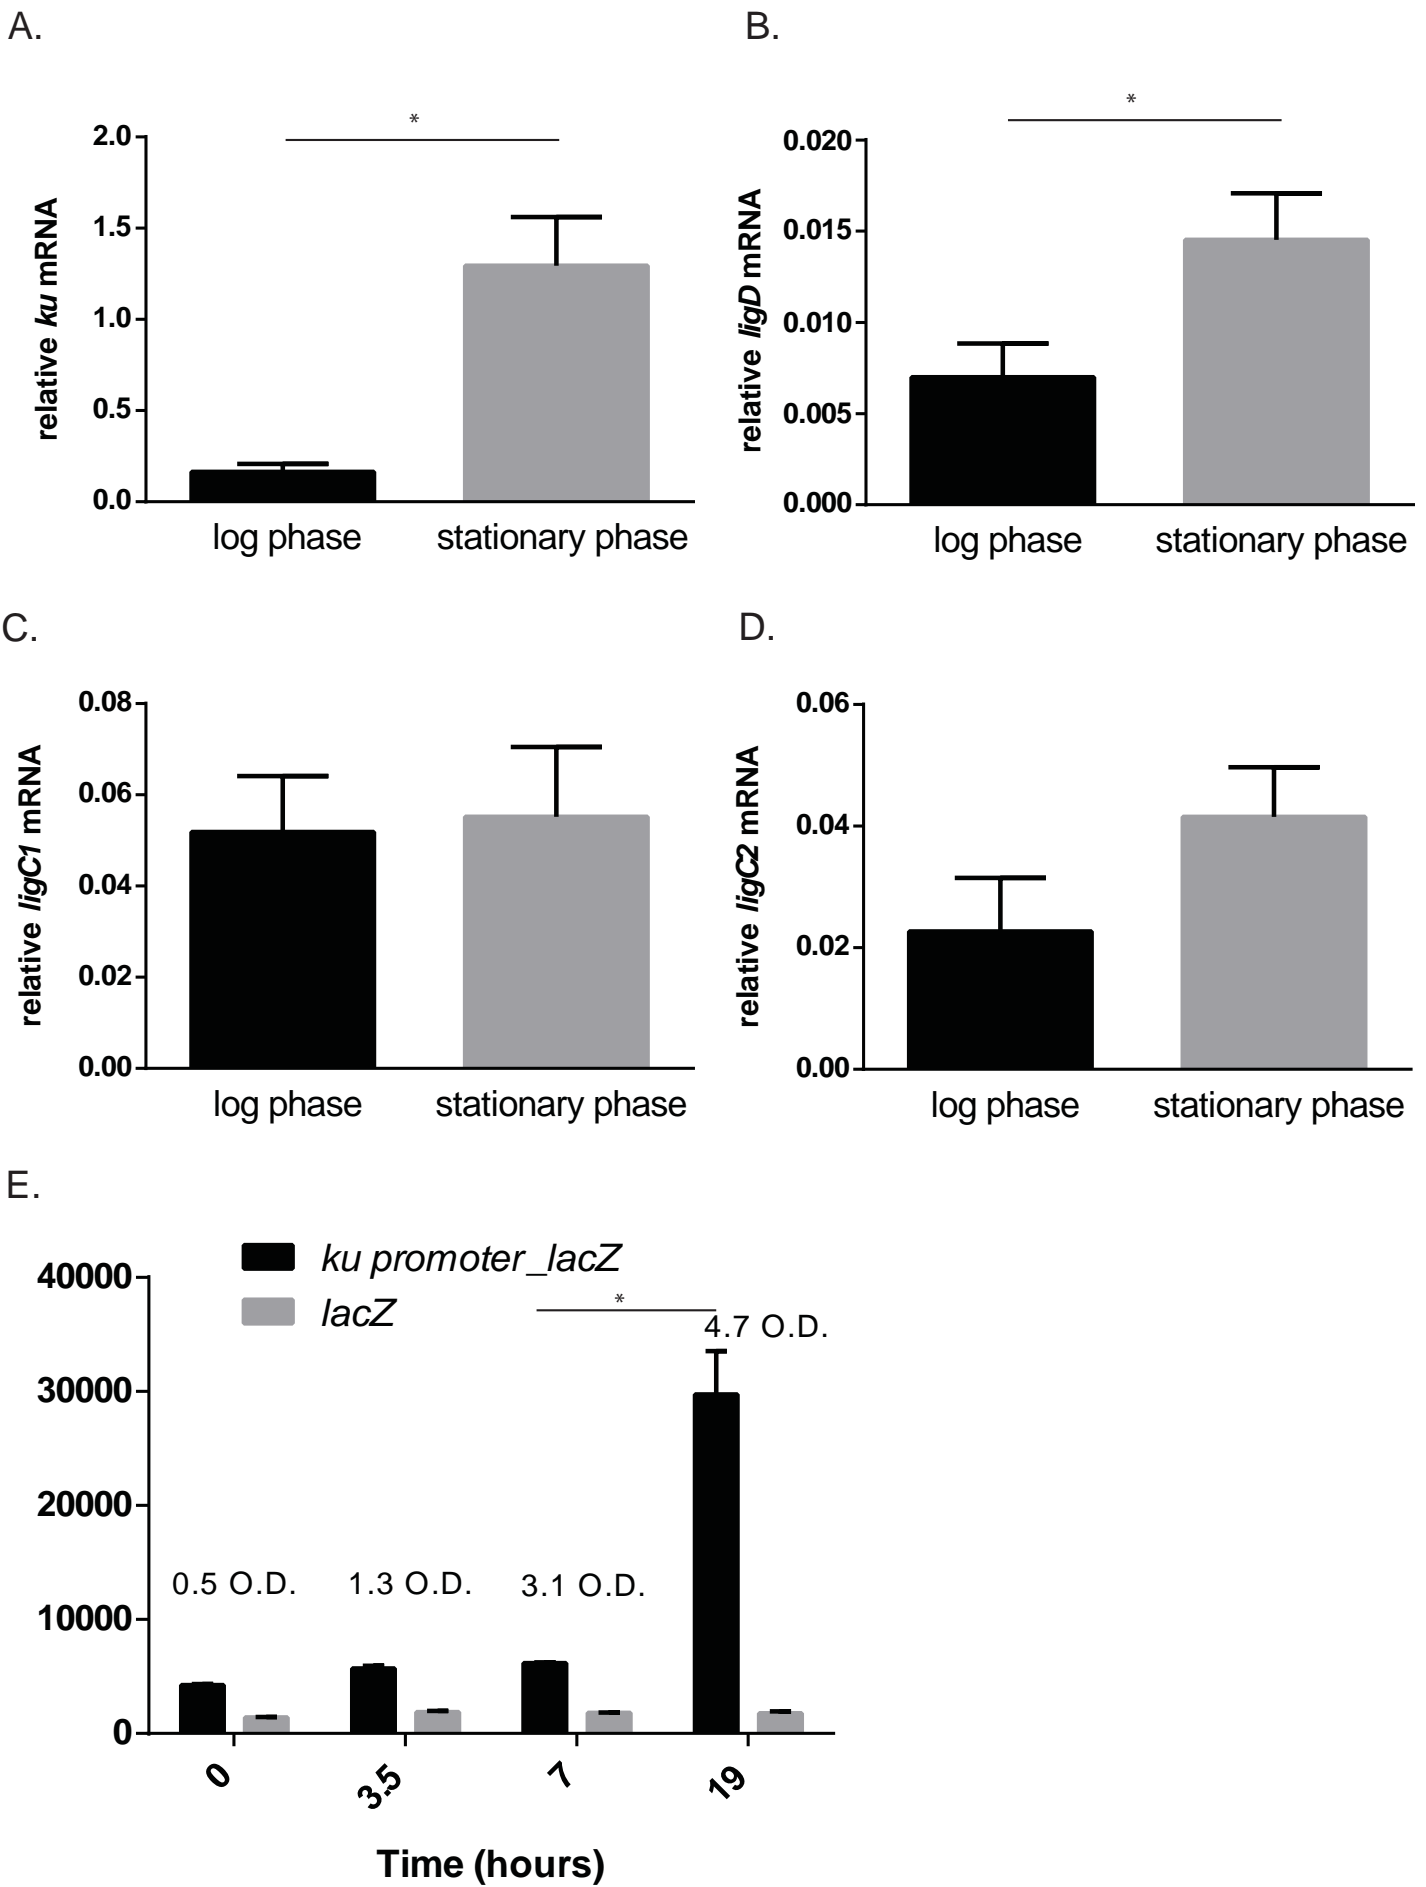

Figure S7
